# Supplementary material for: Hypoxia-driven mobilization of altruistic cancer stem cells in platinum-treated head and neck cancer
Source: Frontiers journal article supplement (doi:10.3389/fimmu.2024.1336882), 2025-02-03
Supplement: Table_3.pdf [file Table_3.pdf]

**Supplementary Table 3:** Serial transplantation assay results of SCC-25 derived EpCAM+/ABCG2+ cells

| Cell source                                                       | Cell dose       | Tumor/injection | CSC frequency              | Cell source                                               | Cell dose       | Tumor/injection | CSC frequency       |
|-------------------------------------------------------------------|-----------------|-----------------|----------------------------|-----------------------------------------------------------|-----------------|-----------------|---------------------|
| EpCAM+/ABCG2-<br>(cisplatin+ group)                               | $1 \times 10^2$ | 0/10            | $1/5.1 \times 10^5$        | EpCAM+ ABCG2+<br>(Secondary<br>Transplant,<br>Cisplatin+) | $1 \times 10^2$ | 0/5             | 1/1278              |
|                                                                   | $1 \times 10^3$ | 0/10            |                            |                                                           | $5 \times 10^2$ | 2/10            |                     |
|                                                                   | $1 \times 10^4$ | 1/15            |                            |                                                           | $1 \times 10^3$ | 7/10            |                     |
|                                                                   | $1 \times 10^5$ | 2/15            |                            |                                                           | $1 \times 10^4$ | 5/5             |                     |
| EpCAM+ABCG2+<br>(cisplatin+ group)                                | $1 \times 10^2$ | 5/10            | 1/125                      | EpCAM+ ABCG2+<br>(Tertiary transplant,<br>Cisplatin+)     | $1 \times 10^2$ | 0/5             | 1/1086              |
|                                                                   | $5 \times 10^2$ | 10/10           |                            |                                                           | $5 \times 10^2$ | 2/10            |                     |
|                                                                   | $1 \times 10^3$ | 5/5             |                            |                                                           | $1 \times 10^3$ | 8/10            |                     |
|                                                                   | $1 \times 10^4$ | 5/5             |                            |                                                           | $1 \times 10^4$ | 10/10           |                     |
| EpCAM+/ABCG2-<br>cells (control)                                  | $1 \times 10^2$ | 0/10            | $1 \times 1.1 \times 10^6$ | EpCAM+ABCG2+<br>(Cisplatin++)                             | $1 \times 10^2$ | 7/10            | 1/140               |
|                                                                   | $1 \times 10^3$ | 0/10            |                            |                                                           | $5 \times 10^2$ | 9/10            |                     |
|                                                                   | $1 \times 10^4$ | 0/10            |                            |                                                           | $1 \times 10^3$ | 10/10           |                     |
|                                                                   | $1 \times 10^5$ | 1/15            |                            |                                                           | $1 \times 10^4$ | 5/5             |                     |
| EpCAM+ABCG2+<br>(control)                                         | $1 \times 10^2$ | 0/10            | 1/1149                     | EpCAM+/ABCG2-<br>(Cisplatin++)                            | $1 \times 10^2$ | 0/10            | $1/3.7 \times 10^5$ |
|                                                                   | $5 \times 10^2$ | 4/10            |                            |                                                           | $5 \times 10^2$ | 0/10            |                     |
|                                                                   | $1 \times 10^3$ | 6/10            |                            |                                                           | $1 \times 10^3$ | 1/15            |                     |
|                                                                   | $1 \times 10^4$ | 5/5             |                            |                                                           | $1 \times 10^4$ | 3/15            |                     |
| EpCAM+ABCG2+<br>(Secondary<br>transplant, cisplatin+<br>+ group)  | $1 \times 10^2$ | 0/5             | 1/1081                     | CD44+ALDH1+cells<br>(Cisplatin++)                         | $1 \times 10^2$ | 1/5             | 1/769               |
|                                                                   | $5 \times 10^2$ | 0/5             |                            |                                                           | $5 \times 10^2$ | 4/10            |                     |
|                                                                   | $1 \times 10^3$ | 1/5             |                            | CD44+ALDH1+cells<br>(Cisplatin+)                          | $1 \times 10^3$ | 4/5             | 1/909               |
|                                                                   | $1 \times 10^4$ | 2/5             |                            |                                                           | $1 \times 10^3$ | 4/5             |                     |
| EpCAM+/ABCG2-<br>(Secondary<br>transplant, cisplatin+<br>+ group) | $1 \times 10^3$ | 0/8             | $1/7.7 \times 10^5$        | CD44+/ALDH1+<br>cells (Control)                           | $1 \times 10^2$ | 0/5             | 1/1519              |
|                                                                   | $1 \times 10^4$ | 0/10            |                            |                                                           | $5 \times 10^2$ | 1/5             |                     |
|                                                                   | $1 \times 10^5$ | 2/15            |                            |                                                           | $1 \times 10^3$ | 3/5             |                     |
|                                                                   |                 |                 |                            |                                                           |                 |                 |                     |

To perform serial transplantation assay, the NOD/SCID mice bearing primary subcutaneous tumors were sacrificed to obtain the tumors, which were then dissociated to obtain single tumor cell suspension. These tumor cells were subjected to immunomagnetic or flow cytometry sorting (CD44+/ALDH1+ cells) and the sorted cells were injected subcutaneously to mice to obtain secondary tumors. Then the protocols for the in vivo limiting dilution assay were followed to obtain the CSC frequency of the secondary transplants. The secondary transplant tumors were then subjected to another round of in vivo limiting dilution assay to obtain the tertiary tumor transplant, and their CSC frequency.
